# Supplementary material for: Detection of Pig Cells Harboring Porcine Endogenous Retroviruses in Non-Human Primate Bladder After Renal Xenotransplantation
Source: MDPI journal article supplement (doi:10.3390/v11090801), 2019-08-29
Supplement: s1 [file s1]

1     **Supplementary Materials**

2     **S1. Detection and classification of PERV by PCR**

3             gDNA was isolated from different tissues with a DNA mini kit (Qiagen, CA, USA) and 50 ng of  
4     gDNA was used in PCR. The cycling reaction was performed under the following conditions:  
5     denaturation at 94°C for 3 min, 30 cycles at 94°C for 10 sec, 55°C for 10 sec, 72°C for 10 sec, and  
6     extension at 72°C for 30 sec.

7

8

**Table S1.** Primers used for detection of PERV types

| Name     | Sequence (5' to 3')    |
|----------|------------------------|
| PERV-A-F | TCTGGGAGAAAGAAAGGATCTG |
| PERV-A-R | CGATTAAAGGCTTCAGTCTGGT |
| PERV-B-F | GGGCAAGTACAAAGTGATGAAA |
| PERV-B-R | TTCTAGGCGTGTTGGTAGGAAT |
| PERV-C-F | TGGATTAGAACTGGAAGC     |
| PERV-C-R | TTTGACCCGTCAAGACCG     |

9

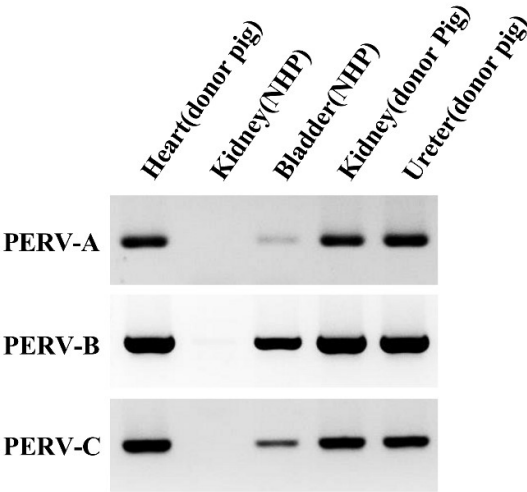

10

11     **Figure S1.** Detection of PERV by PCR with type-specific primers from gDNA. The PERV-subtypes (PERV-A, B, C)  
12     were detected by PCR with type-specific primers from gDNA of different tissues.
